# Supplementary material for: Enzymatic Synthesis and Molecular Modelling Studies of Rhamnose Esters Using Lipase from Pseudomonas stutzeri
Source: MDPI journal article supplement (doi:10.3390/ijms23042239), 2022-02-17
Supplement: s1 [file s1]

**Supplementary Material for**  
**Enzymatic Synthesis and Molecular Modeling Studies of Rhamnose Esters using**  
**Lipase from *Pseudomonas stutzeri***

Cecilia Garcia-Oliva <sup>1</sup>, Almudena Perona <sup>1</sup>, Ángel Rumero <sup>2</sup>, Pilar Hoyos <sup>1</sup>, and María J. Hernáiz <sup>1,\*</sup>

<sup>1</sup> Department of Chemistry in Pharmaceutical Sciences, Faculty of Pharmacy, Complutense University of Madrid, Plaza Ramón y Cajal, E 28040 Madrid, Spain

<sup>2</sup> Department of Organic Chemistry, Autonomous University of Madrid, Cantoblanco, 28049 Madrid, Spain

\* Correspondence: mjhernai@ucm.es

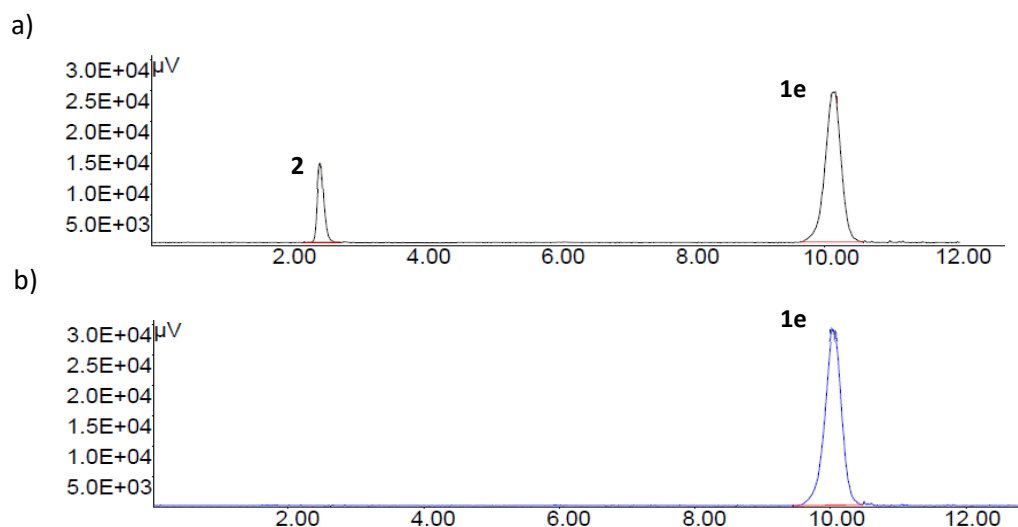

**Figure S1.** HPLC analyses of different reaction times of the PSL-catalysed transesterification reaction of **2** with the acyl donor **3e** (synthesis of **1e**); mobile phase: acetonitrile:water, 70:30, flow 0.7 mL/min: a) reaction time 2 h; b) reaction time 3 h.

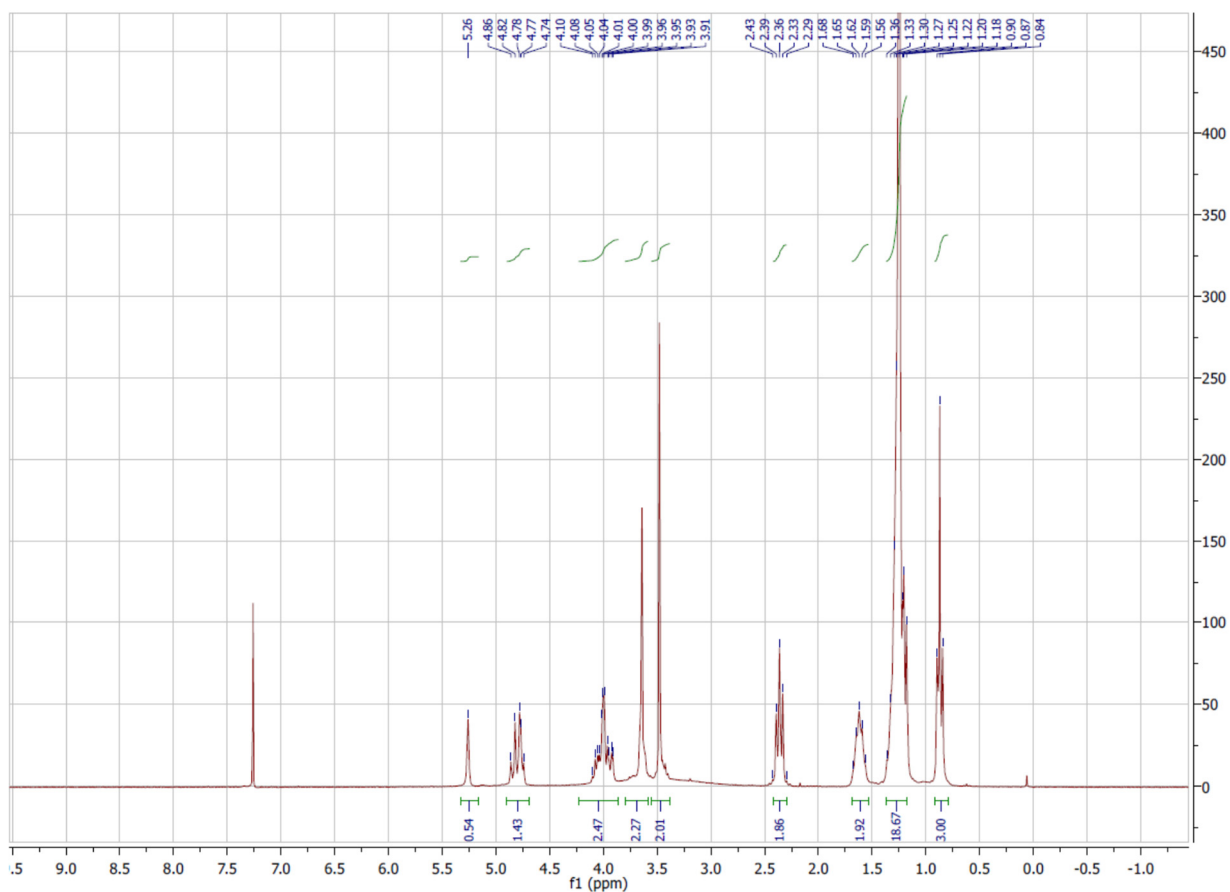

**Figure S2.**  $^1\text{H}$ -NMR spectra 4-*O*-lauroylrhamnose (**1e**).

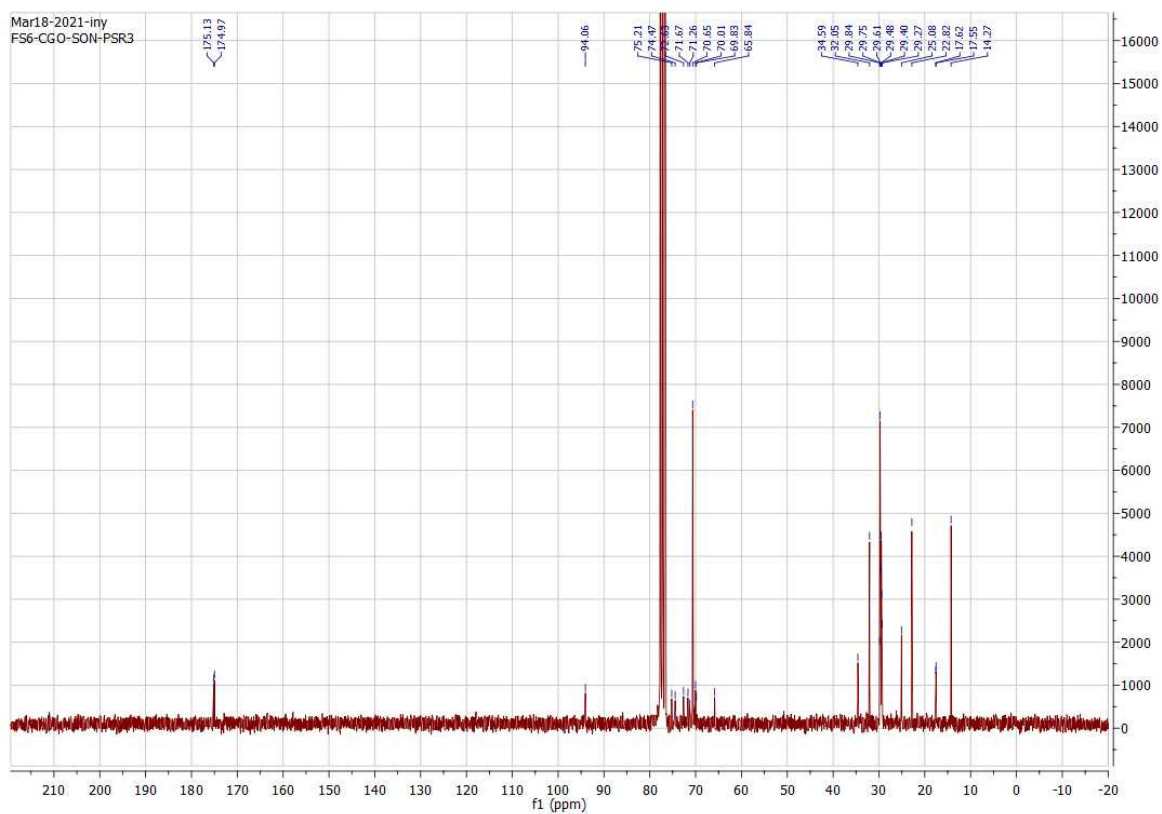

**Figure S3.**  $^{13}\text{C}$ -NMR spectra 4-*O*-lauroylrhamnose (**1e**).

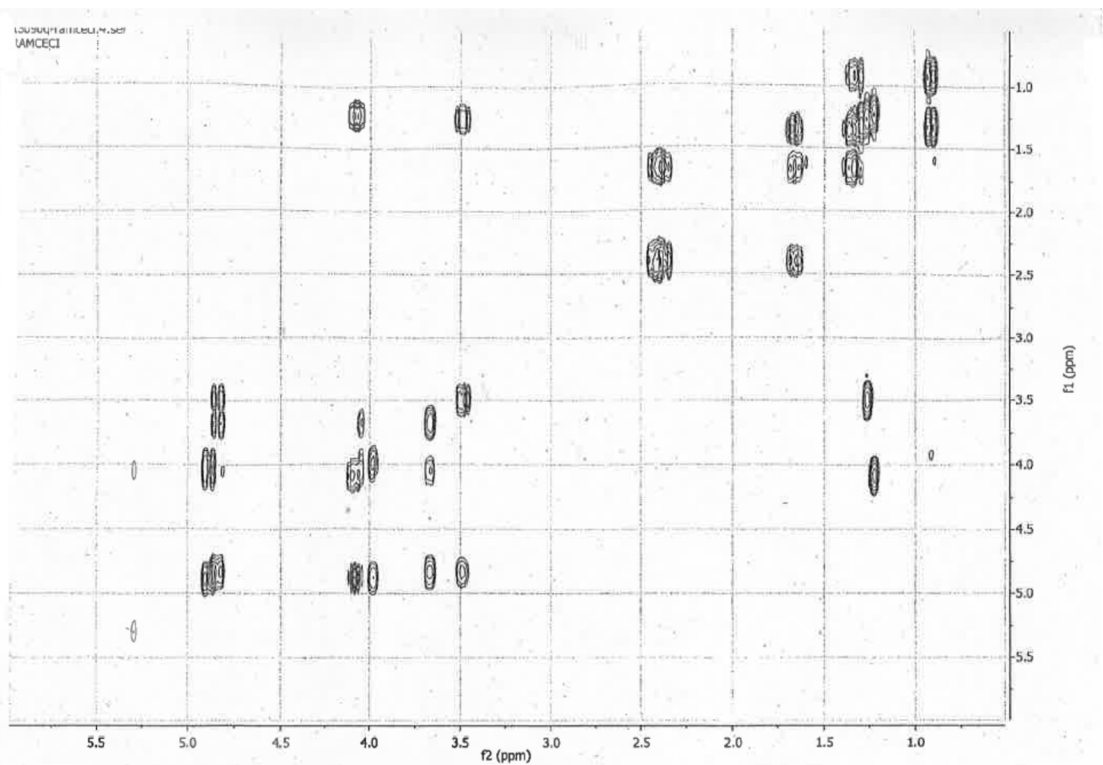

Figure S4. COSY spectrum of 4-O-lauroylrhamnose (**1e**)

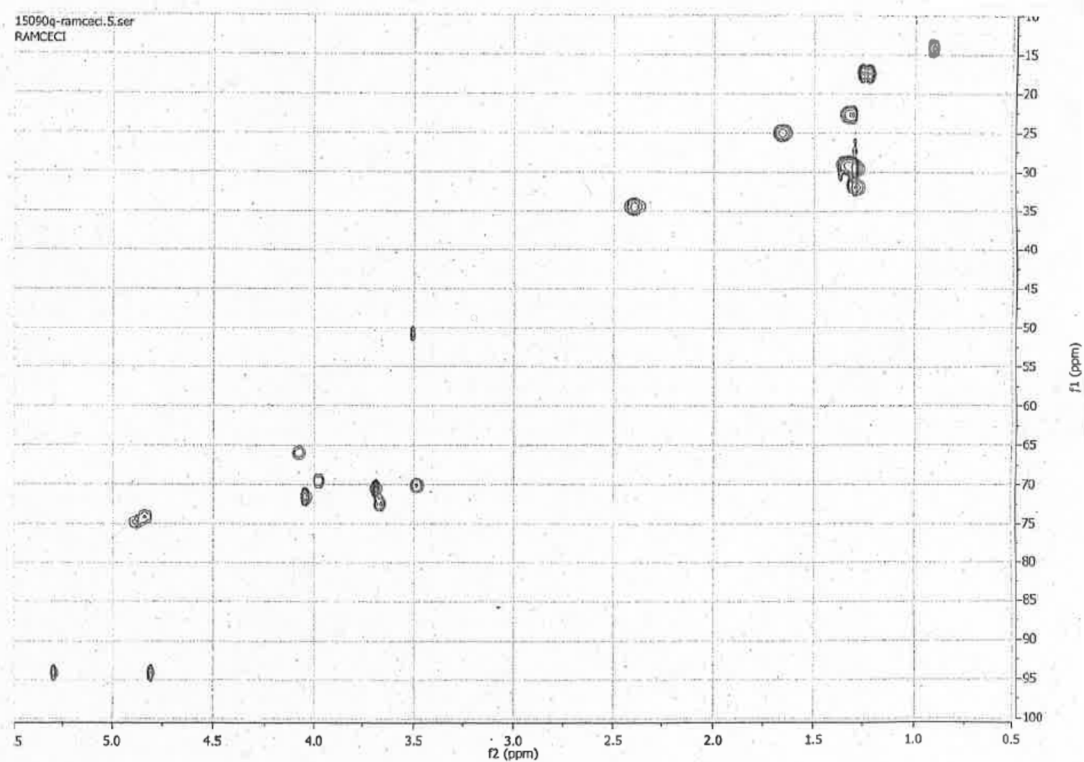

Figure S5. HSQC spectrum of 4-O-lauroylrhamnose (**1e**)

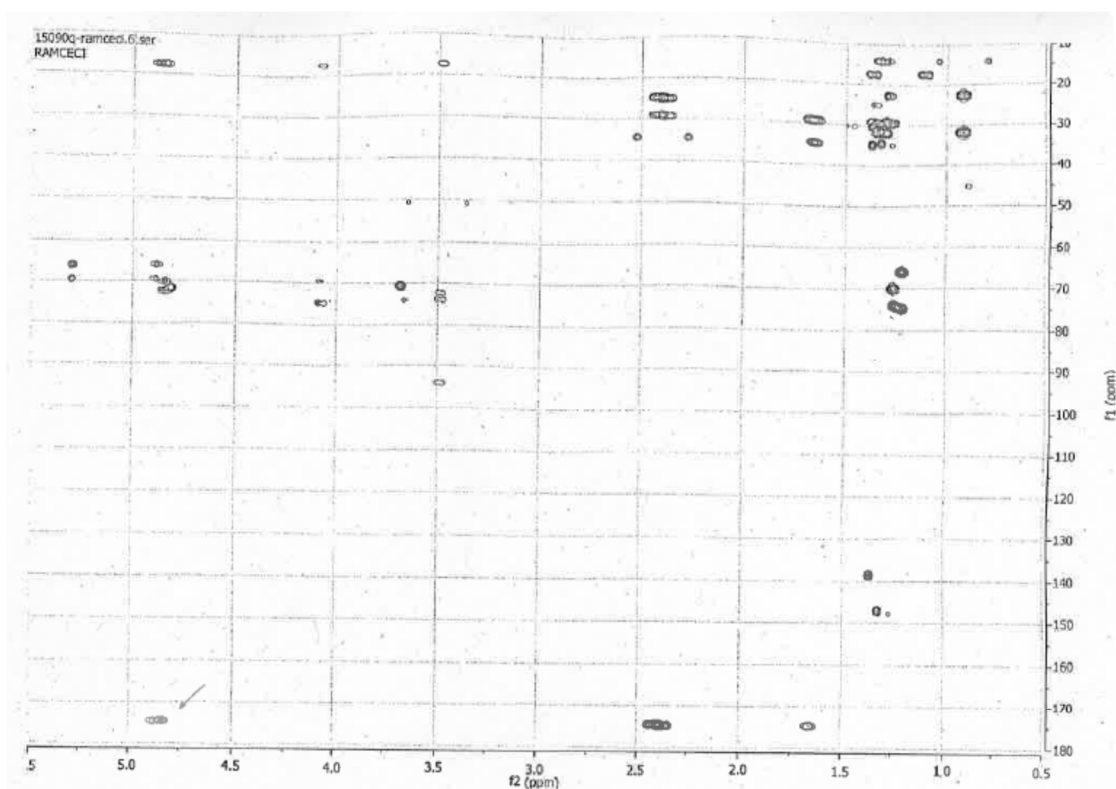

Figure S6. HMBC spectrum of 4-O-lauroylrhamnose (**1e**)

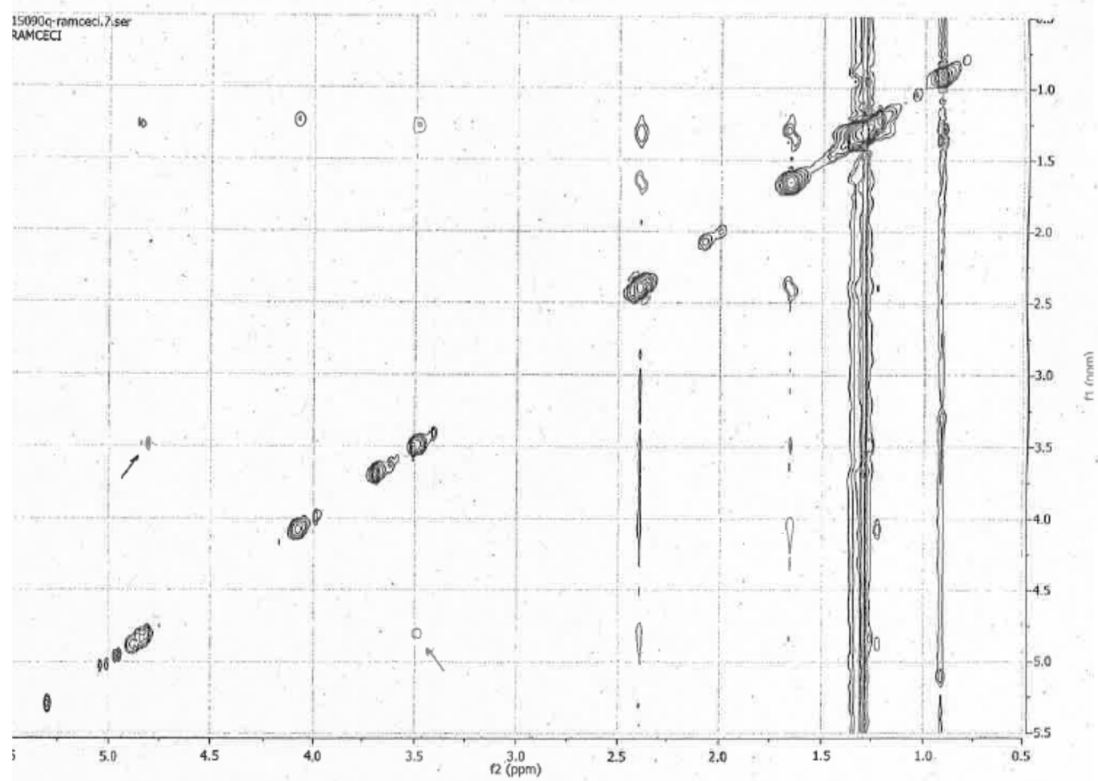

Figure S7. ROESY spectrum of 4-O-lauroylrhamnose (**1e**)

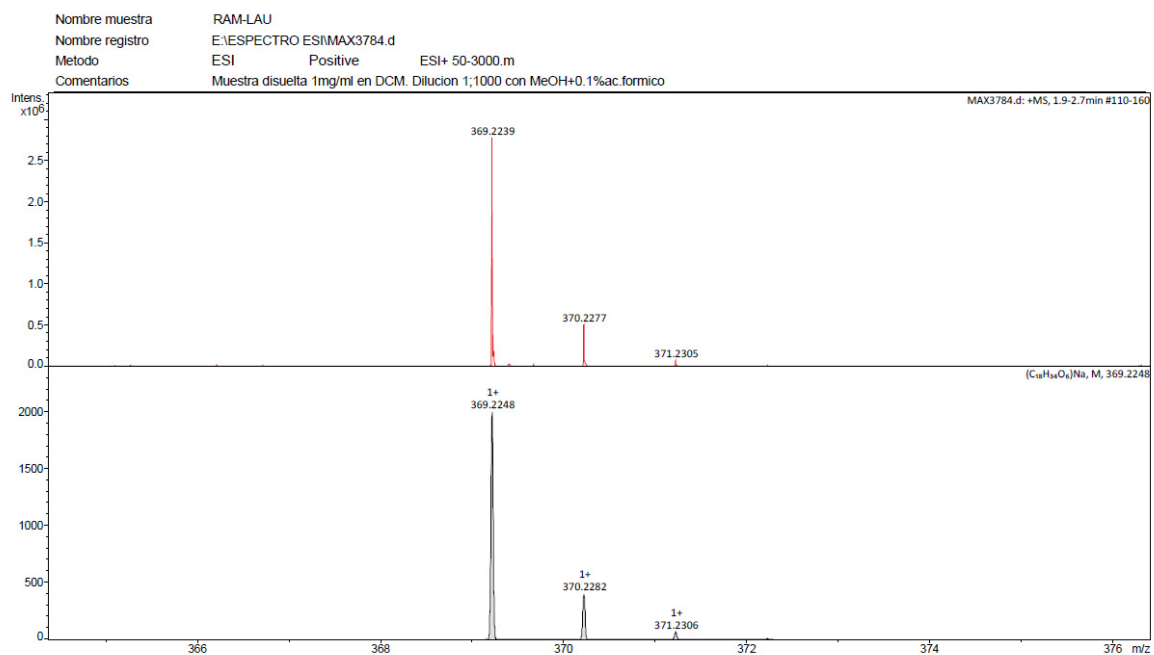

**Figure S8.** MS spectra for 4-*O*-lauroylrhhamnose (**1e**).

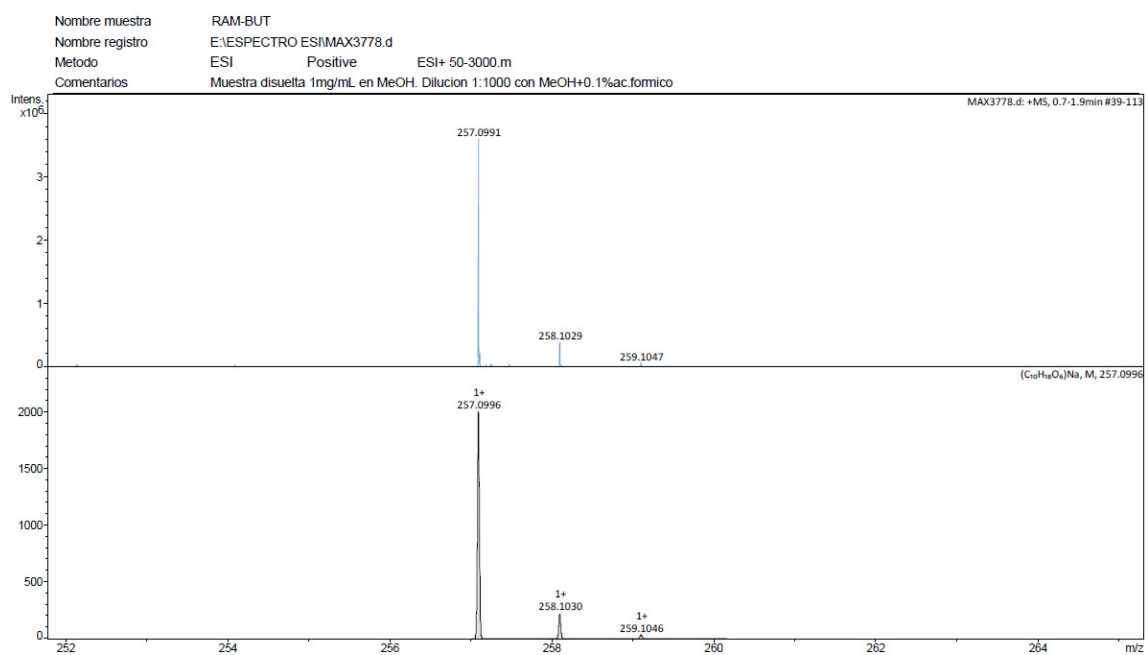

**Figure S9.** MS spectra for 4-*O*-butyrylrhhamnose (**1a**).

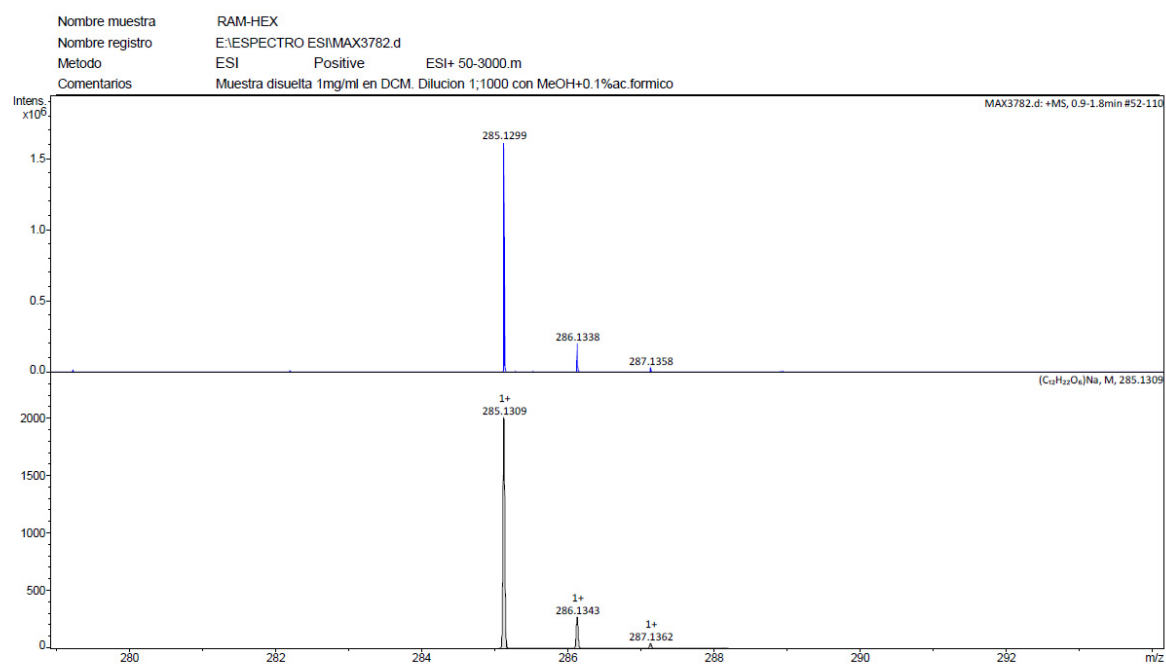

**Figure S10.** MS spectra for 4-*O*-hexanoylrhamnose (**1b**).

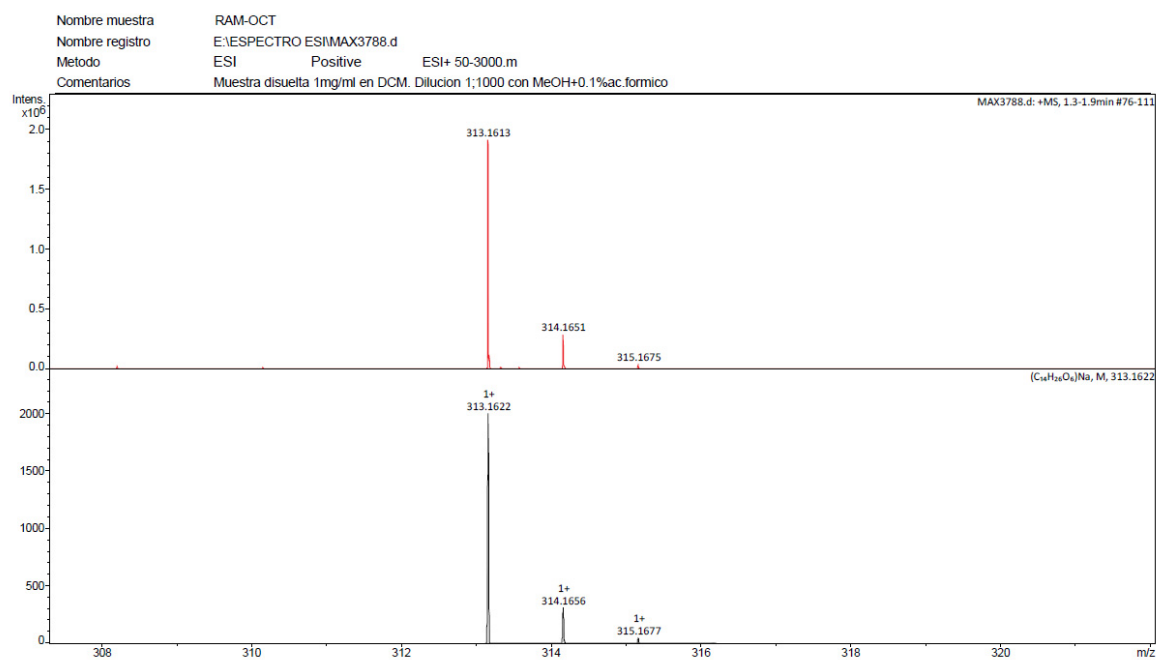

**Figure S11.** MS spectra for 4-*O*-octanoylrhamnose (**1c**).

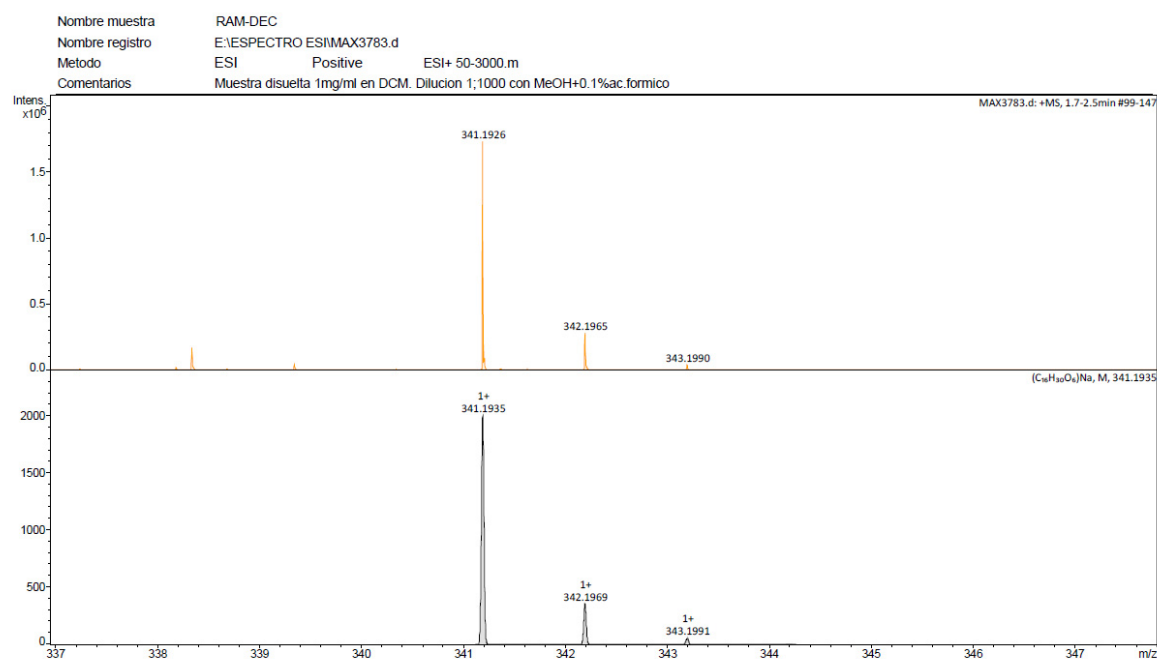

**Figure S12.** MS spectra for 4-*O*-decanoylrhamnose (**1d**).

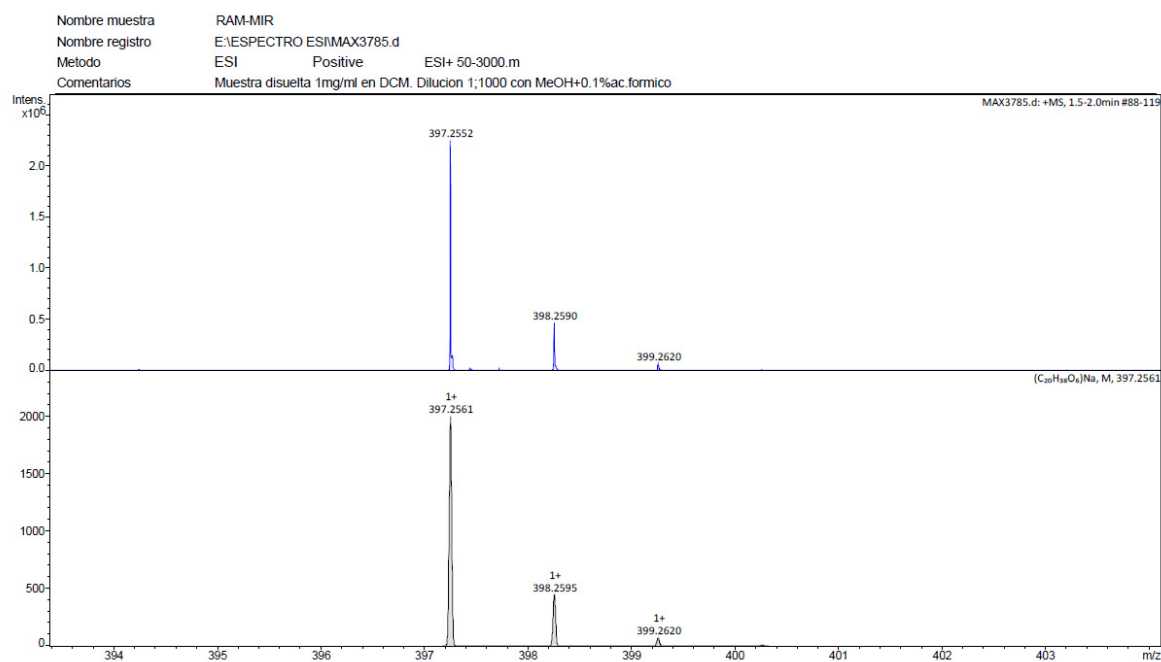

**Figure S13.** MS spectra for 4-*O*-myristylrhamnose (**1f**).

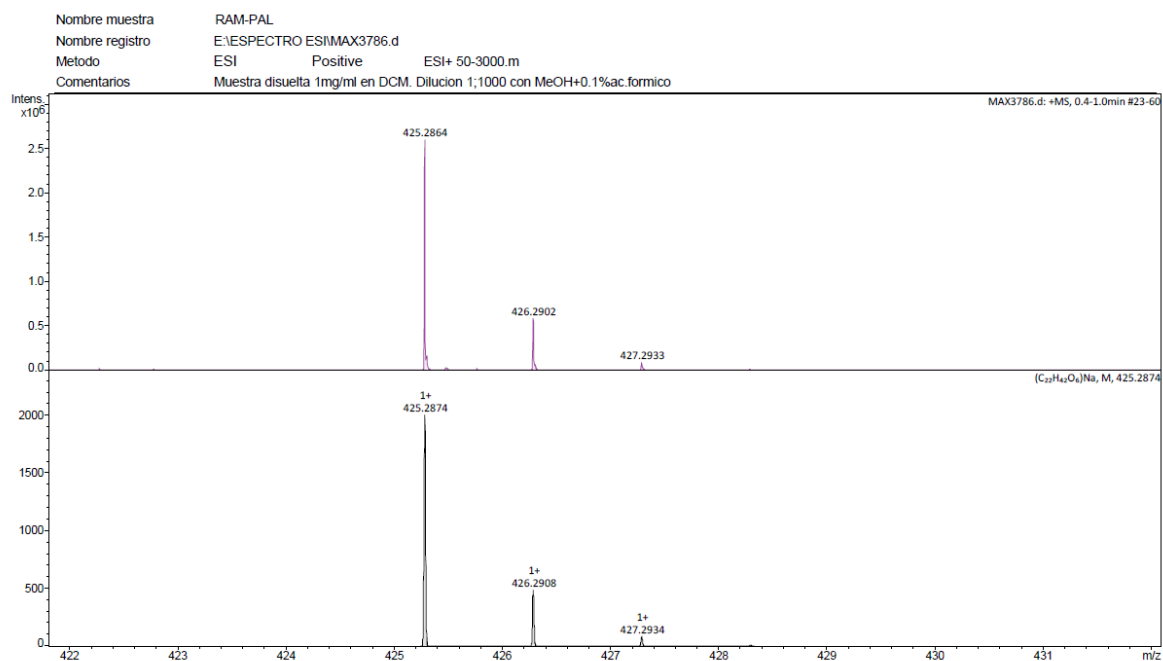

**Figure S14.** MS spectra for 4-*O*-palmitoylrhamnose (**1g**).

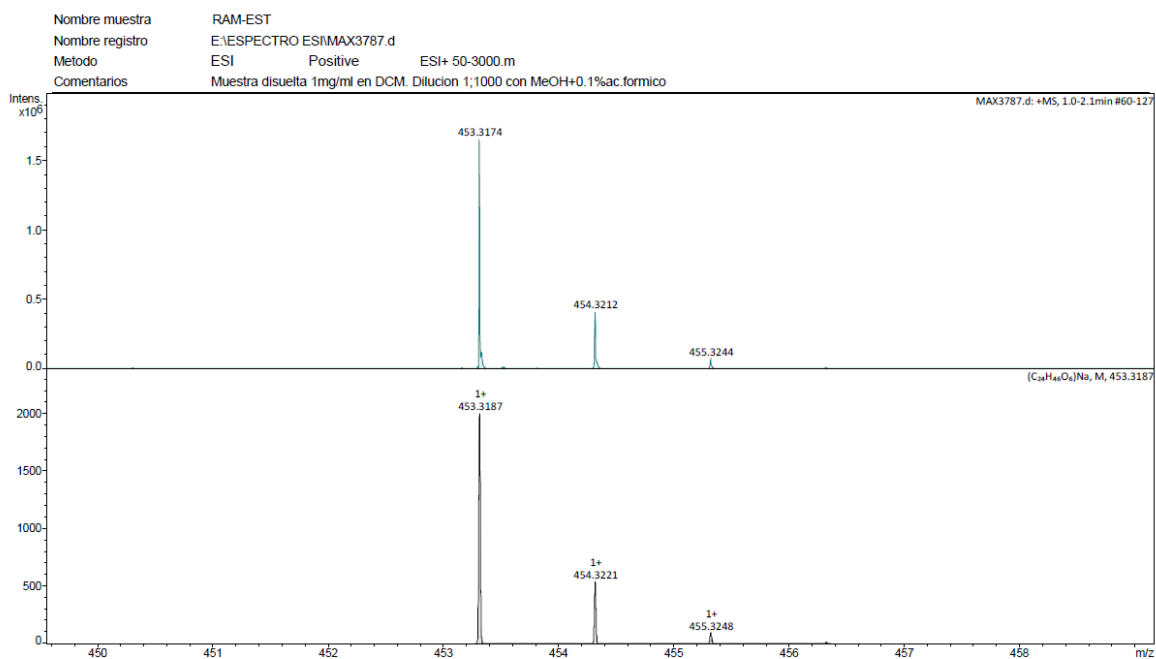

**Figure S15.** MS spectra for 4-*O*-stearoylrhamnose (**1h**).
